# Supplementary material for: A Dy-based single ion magnet in a SrLaGaO4 matrix: enhanced parameters in an expanded crystal lattice
Source: Royal Society of Chemistry journal article supplement (doi:10.1039/d3dt03387b), 2023-01-01
Supplement: d3dt03387b1.pdf [file d3dt03387b1.pdf]

## Dy-based single ion magnet in the SrLaGaO<sub>4</sub> matrix: the enhanced parameters in an expanded crystal lattice

Alexander V. Vasiliev,<sup>a</sup> Timur Z. Sharifullin,<sup>a</sup> Elena D. Demidova,<sup>a</sup> Reinhard Kremer,<sup>b</sup> Pavel E. Kazin<sup>\*a</sup>

<sup>a</sup>Department of Chemistry, Lomonosov Moscow State University, 119991 Moscow, Russia. E-mail: kazin@inorg.chem.msu.ru; Tel: +7 495 9393440

<sup>b</sup>Max Planck Institute for Solid State Research, Heisenbergstrasse 1, 70569 Stuttgart, Germany

### Supporting Information

#### X-ray powder diffraction data

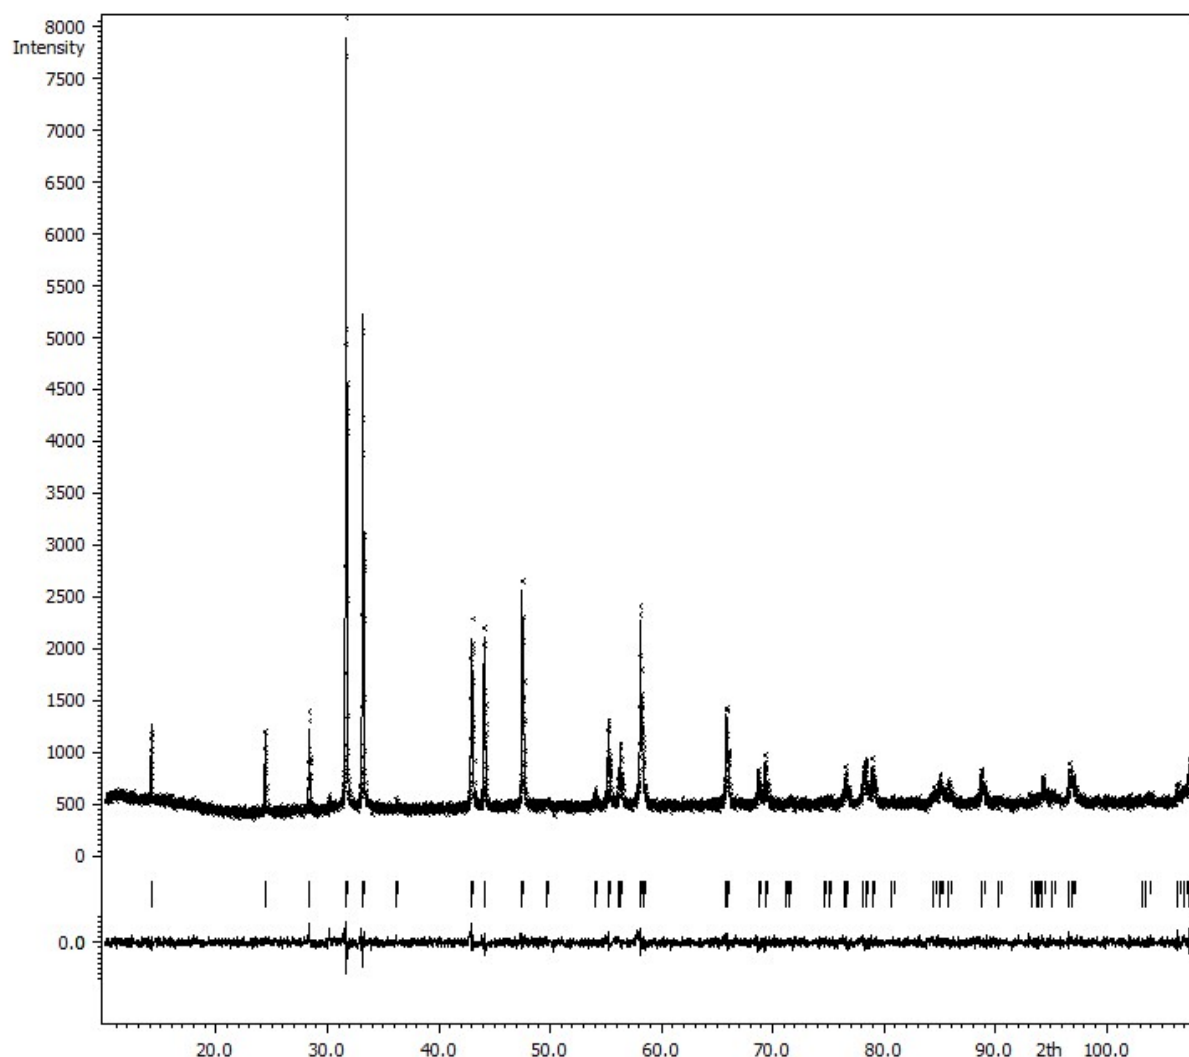

**Figure S1.** Powder X-ray diffraction pattern of SrLa<sub>0.95</sub>Dy<sub>0.05</sub>GaO<sub>4</sub>. Observed (crosses), calculated (solid line) and difference (solid line below) plots. Positions of Bragg reflections are shown as strokes underneath.

**Table S1.** Crystal structure refinement data for SrLa<sub>0.95</sub>Dy<sub>0.05</sub>GaO<sub>4</sub>.

|                                                                            |            |
|----------------------------------------------------------------------------|------------|
| Temperature (K)                                                            | 293 K      |
| Wavelength (Å)                                                             | 1.54187    |
| Space group                                                                | I4/mmm     |
| <i>a</i> (Å)                                                               | 3.8413(1)  |
| <i>c</i> (Å)                                                               | 12.6772(3) |
| <i>V</i> (Å <sup>3</sup> )                                                 | 187.06(1)  |
| <i>Z</i>                                                                   | 2          |
| 2θ range (deg.)                                                            | 10 – 108   |
| <i>R</i> <sub>wp</sub>                                                     | 0.048      |
| <i>R</i> <sub>all</sub>                                                    | 0.031      |
| Δ <i>F</i> <sub>max</sub> , Δ <i>F</i> <sub>min</sub> (e Å <sup>-3</sup> ) | 2.2, -2.1  |

**Table S2.** Atomic parameters and thermal displacement parameters (Å<sup>2</sup>) for SrLa<sub>0.95</sub>Dy<sub>0.05</sub>GaO<sub>4</sub>.

| Atom                    | Sr          | La          | Dy          | Ga       | O1        | O2       |
|-------------------------|-------------|-------------|-------------|----------|-----------|----------|
| Site                    | 4e          | 4e          | 4e          | 2a       | 4c        | 4e       |
| SOF                     | 0.5         | 0.475       | 0.025       | 1        | 1         | 1        |
| <i>x</i>                | 0           | 0           | 0           | 0        | 0         | 0        |
| <i>y</i>                | 0           | 0           | 0           | 0        | 0         | 0.5      |
| <i>z</i>                | 0.35888(16) | 0.35888(16) | 0.35888(16) | 0        | 0.1674(9) | 0        |
| <i>U</i> <sub>iso</sub> | 0.0055(18)  | 0.0055(18)  | 0.0055(18)  | 0.010(2) | 0.014(5)  | 0.008(5) |

**Table S3.** Selected interatomic distances (Å) in the crystal structure of SrLa<sub>0.95</sub>Dy<sub>0.05</sub>GaO<sub>4</sub>.

|              |            |    |
|--------------|------------|----|
| Sr,La,Dy-O1  | 2.427(12)  |    |
| Sr,La,Dy-O1  | 2.7366(15) | 4x |
| Sr,La,Dy -O2 | 2.6248(14) | 4x |
| Ga-O1        | 2.122(12)  | 4x |
| Ga-O2        | 1.92067(7) | 2x |

### ac susceptibility data

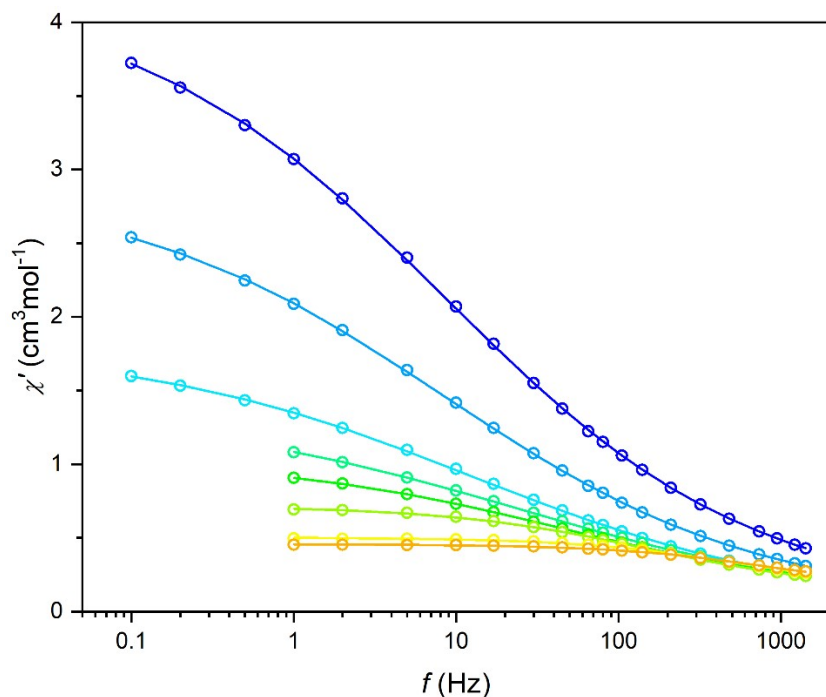

(a)

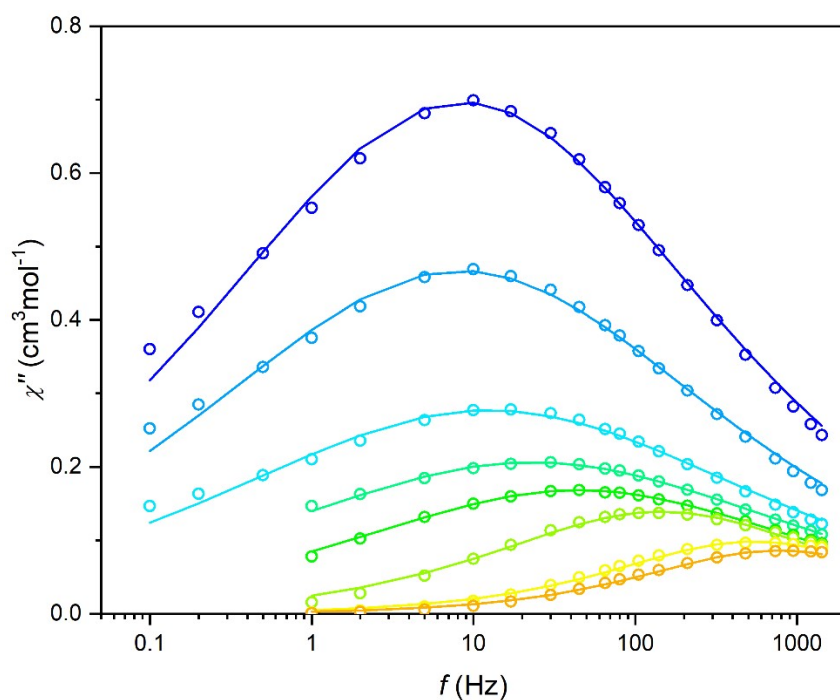

(b)

**Fig. S2.** Frequency dependence of ac susceptibility per mol of Dy for  $\text{SrLa}_{0.95}\text{Dy}_{0.05}\text{GaO}_4$  at temperatures 2 – 22 K under a zero dc magnetic field. (a) – in-phase susceptibility  $\chi'$ , (b) – out-of-phase susceptibility  $\chi''$ . Symbols – experimental points, lines – fitting. The color codes: from blue to orange –  $T = 2, 3, 5, 7, 10, 14, 20, 22$  K.

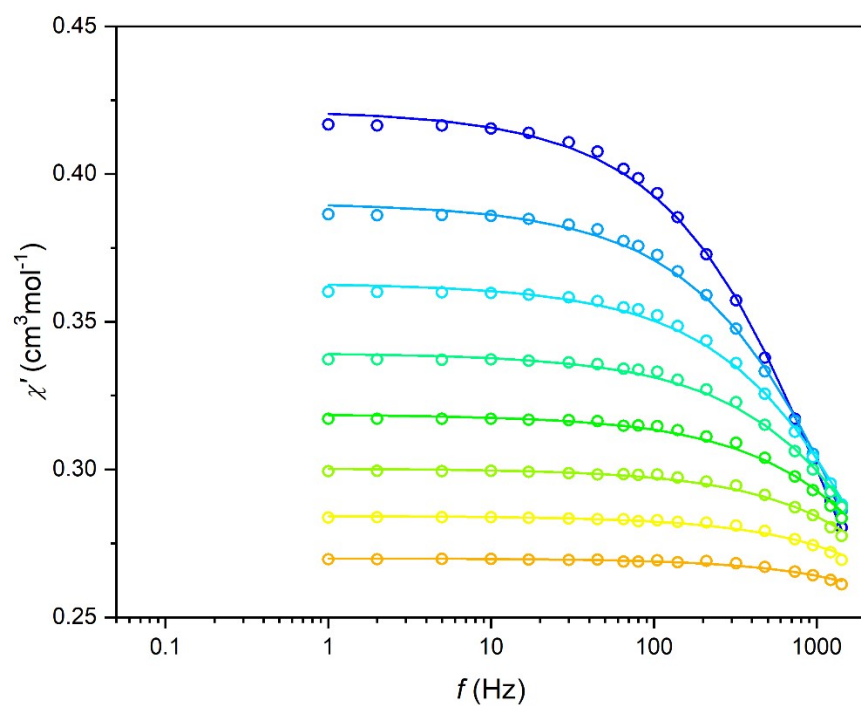

(a)

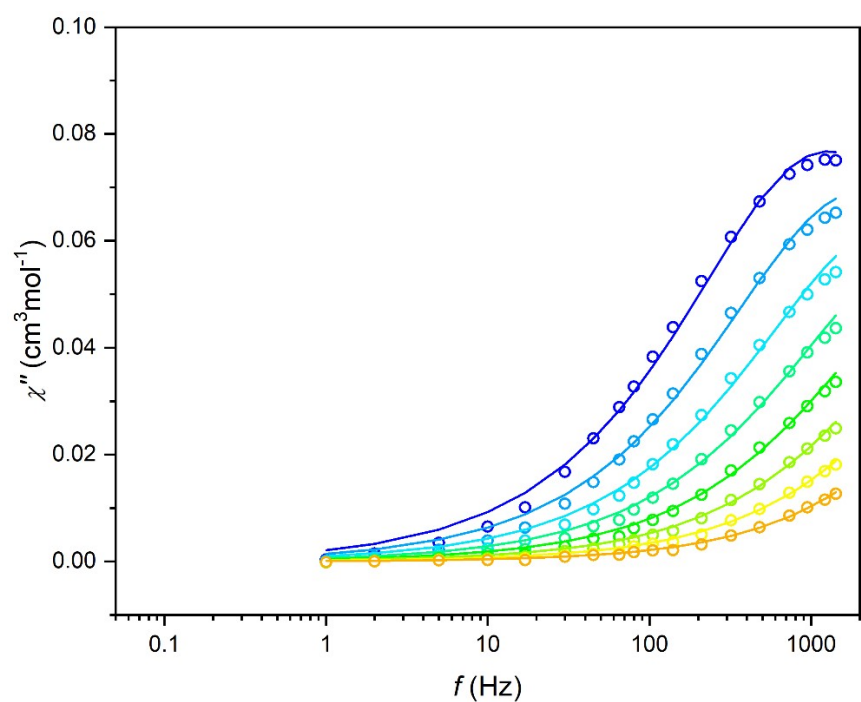

(b)

**Fig. S3.** Frequency dependence of ac susceptibility per mol of Dy for  $\text{SrLa}_{0.95}\text{Dy}_{0.05}\text{GaO}_4$  at temperatures 24 – 38 K under a zero-dc magnetic field. (a) – in-phase susceptibility  $\chi'$ ; (b) – out-of-phase susceptibility  $\chi''$ . Symbols – experimental points, lines – fitting. The color codes: from blue to orange –  $T = 24 - 38$  K, step 2 K.

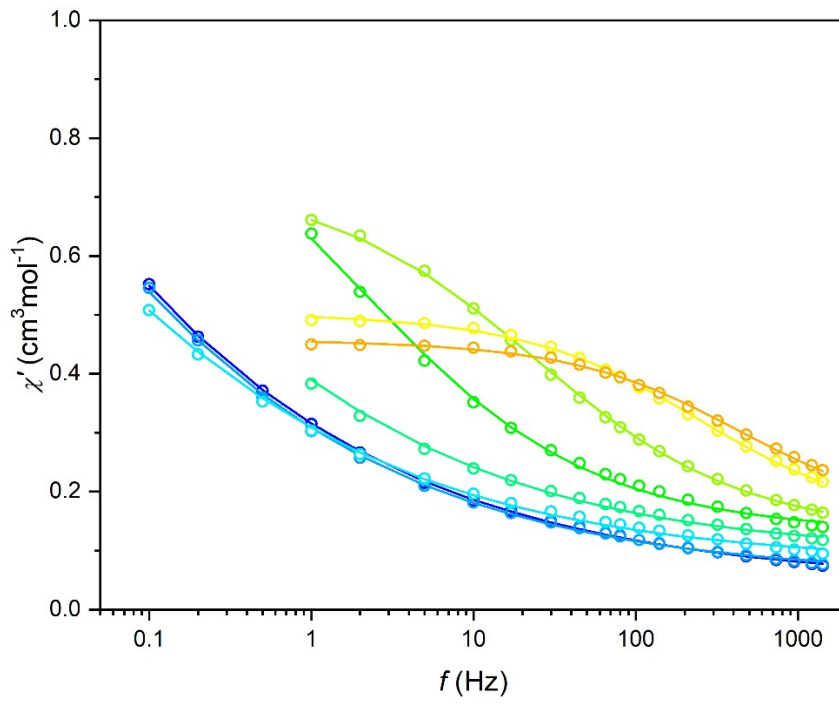

(a)

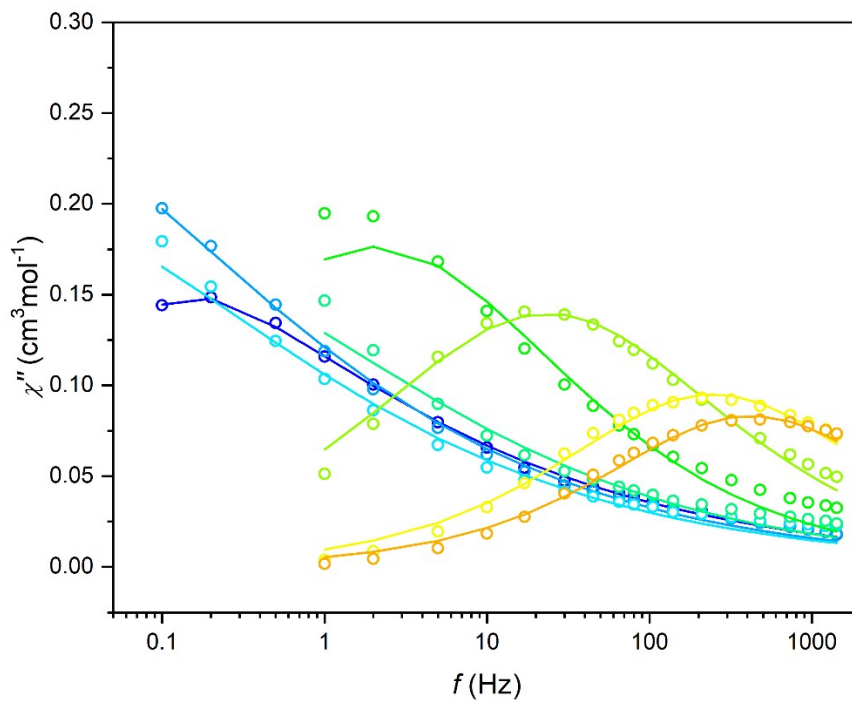

(b)

**Fig. S4.** Frequency dependence of ac susceptibility per mol of Dy for  $\text{SrLa}_{0.95}\text{Dy}_{0.05}\text{GaO}_4$  at temperatures 2 – 22 K under a dc magnetic field of 4 kOe. (a) – in-phase susceptibility  $\chi'$ , (b) – out-of-phase susceptibility  $\chi''$ . Symbols – experimental points, lines – fitting. The color codes: from blue to orange –  $T = 2, 3, 5, 7, 10, 14, 20, 22$  K.

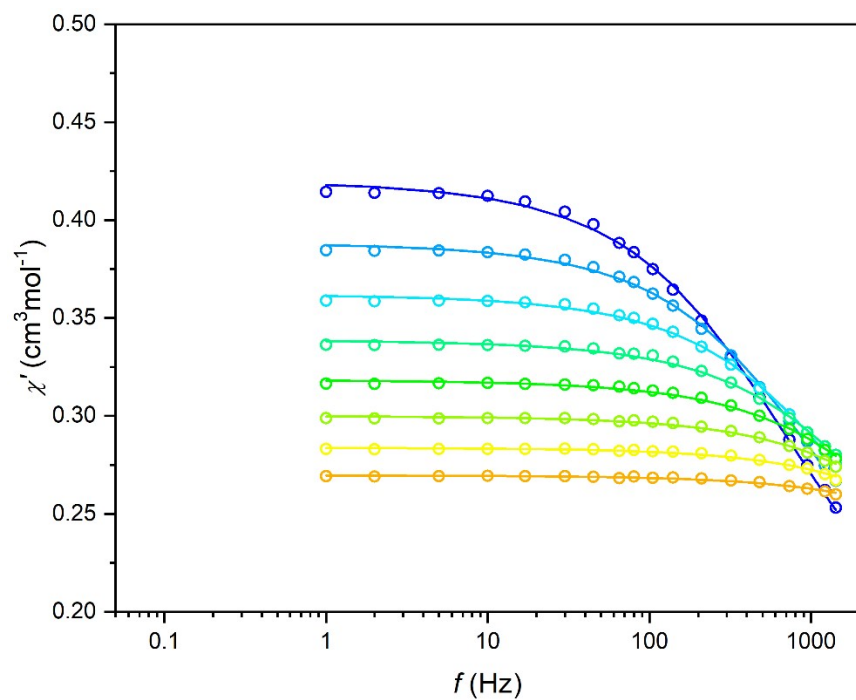

(a)

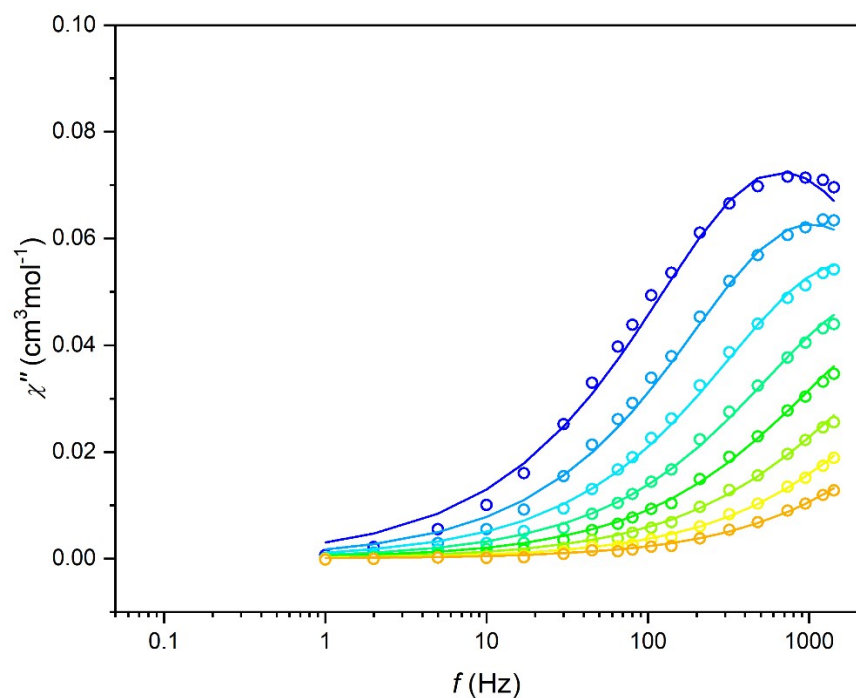

(b)

**Fig. S5.** Frequency dependence of ac susceptibility per mol of Dy for  $\text{SrLa}_{0.95}\text{Dy}_{0.05}\text{GaO}_4$  at temperatures 24 – 38 K under a magnetic field of 4 kOe. (a) – in-phase susceptibility  $\chi'$ , (b) – out-of-phase susceptibility  $\chi''$ . Symbols – experimental points, lines – fitting. The color codes: from blue to orange –  $T = 24 - 38$  K, step 2 K.

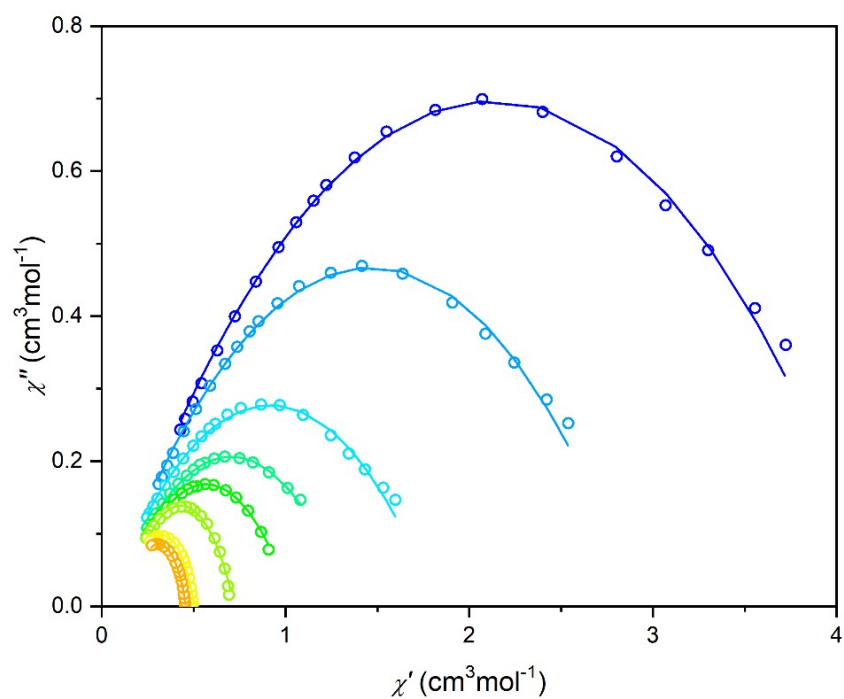

(a)

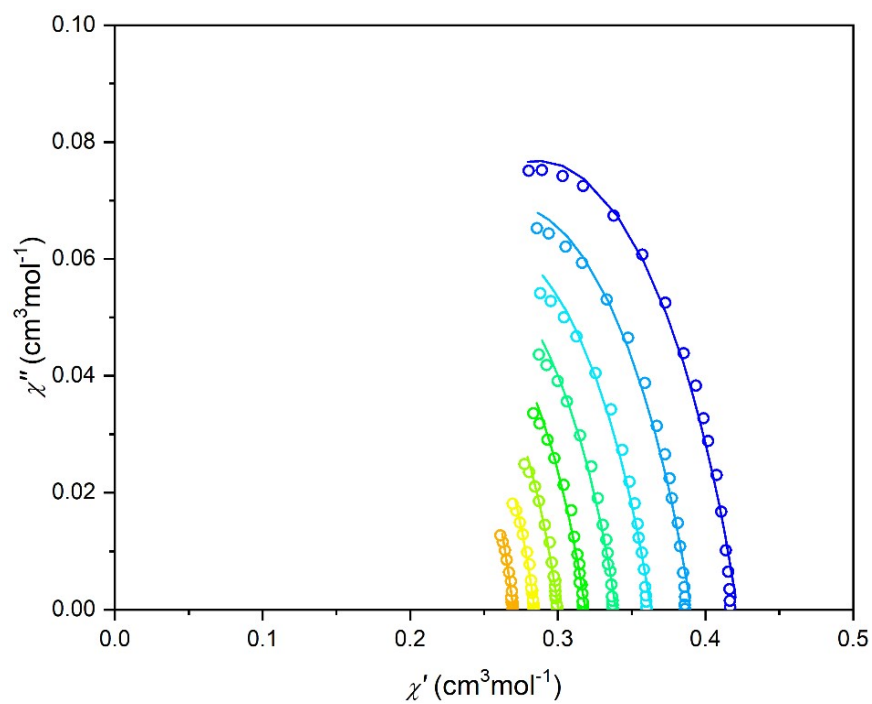

(b)

**Fig. S6.** Cole-Cole plots of ac susceptibility per mol of Dy for  $\text{SrLa}_{0.95}\text{Dy}_{0.05}\text{GaO}_4$  under a zero dc magnetic field: (a) at temperatures 2, 3, 5, 7, 10, 14, 20, 22 K (from blue to orange); (b) at temperatures 24 – 38 K with a step of 2 K (from blue to orange). Symbols – experimental points, lines – fitting.

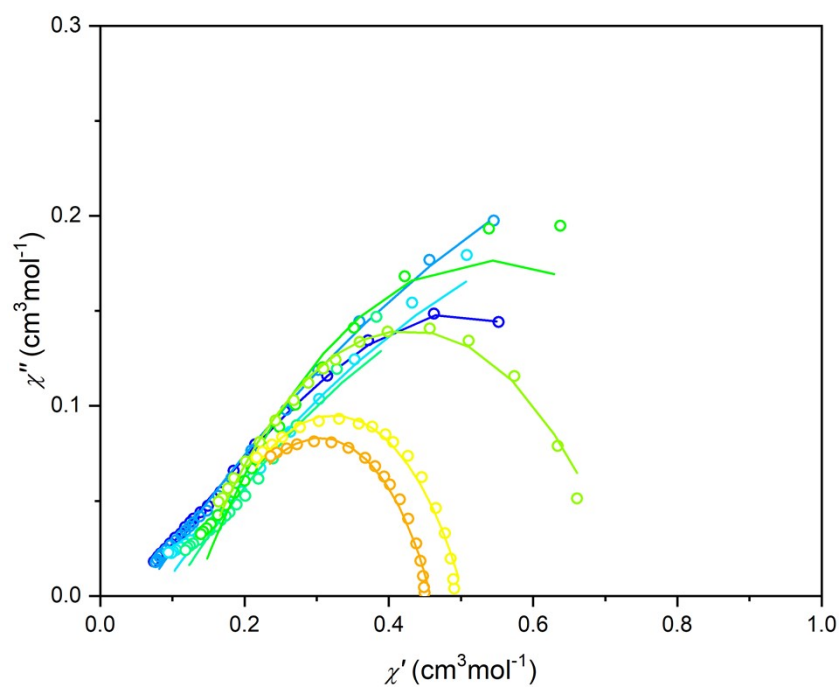

(a)

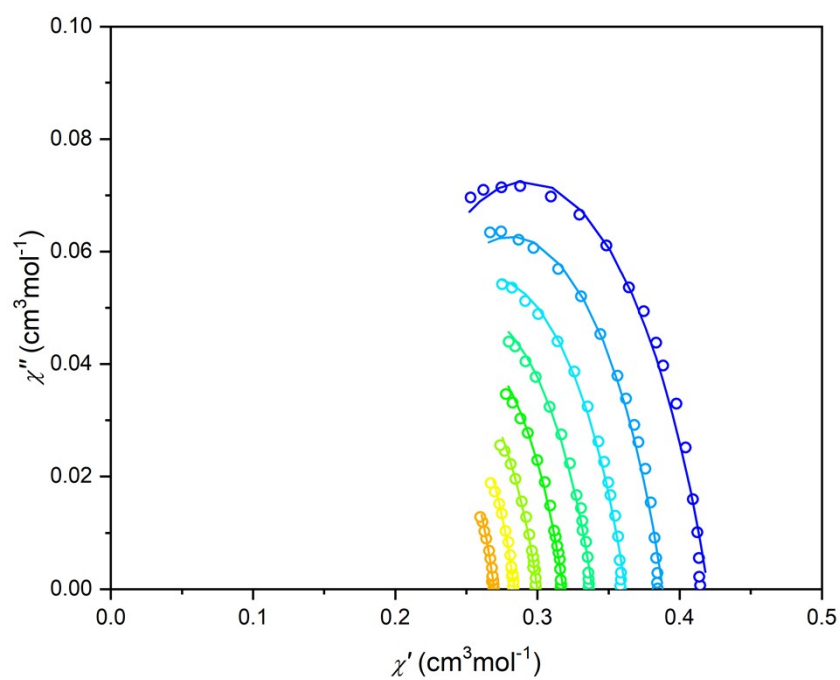

(b)

**Fig. S7.** Cole-Cole plots of ac susceptibility per mol of Dy for  $\text{SrLa}_{0.95}\text{Dy}_{0.05}\text{GaO}_4$  under a dc magnetic field of 4 kOe: (a) at temperatures 2, 3, 5, 7, 10, 14, 20, 22 K (from blue to orange); (b) at temperatures 24 – 38 K with a step of 2 K (from blue to orange). Symbols – experimental points, lines – fitting.



## Electronic structure data

**Table S4.** Crystal field parameters in Wybourne notation derived in the program CONCORD for  $\text{Dy}^{3+}$  using experimental atomic coordinates of the coordination polyhedron (from Table S2) and a partial charge on the oxygen atom of  $0.95e$ .

| Parameter | Value ( $\text{cm}^{-1}$ ) |
|-----------|----------------------------|
| $B_{20}$  | 454.533                    |
| $B_{22}$  | 0                          |
| $B_{40}$  | 77.045                     |
| $B_{42}$  | 0                          |
| $B_{43}$  | 0                          |
| $B_{44}$  | -96.559                    |
| $B_{60}$  | 11.506                     |
| $B_{62}$  | 0                          |
| $B_{63}$  | 0                          |
| $B_{64}$  | 35.837                     |
| $B_{66}$  | 0                          |

**Table S5.** Modeling of the  $\text{Dy}^{3+}$  electronic structure with the PHI program using crystal field parameters listed in Table SX1. The Kramers doublet energies of the ground term  ${}^6\text{H}_{15/2}$  are shown only.

| Kramer's doublet | Energy ( $\text{cm}^{-1}$ ) | $M_J$ (%)                  |
|------------------|-----------------------------|----------------------------|
| $E_0$            | 0                           | 15/2 (99.92)               |
| $E_1$            | 70.14                       | 13/2 (99.65)               |
| $E_2$            | 126.8                       | 11/2 (99.14)               |
| $E_3$            | 170.1                       | 9/2 (97.89)                |
| $E_4$            | 201.5                       | +7/2 (95.35), -1/2 (4.05)  |
| $E_5$            | 220.8                       | +5/2 (79.75), -3/2 (19.60) |
| $E_6$            | 243.2                       | +3/2 (78.93), -5/2 (19.65) |
| $E_7$            | 247.3                       | +1/2 (94.01), -7/2 (4.35)  |
